# Supplementary material
Source: PubMed Central journal article supplement (PMC9476163)
Supplement: NIHMS1813804-supplement-1.pdf [file NIHMS1813804-supplement-1.pdf]

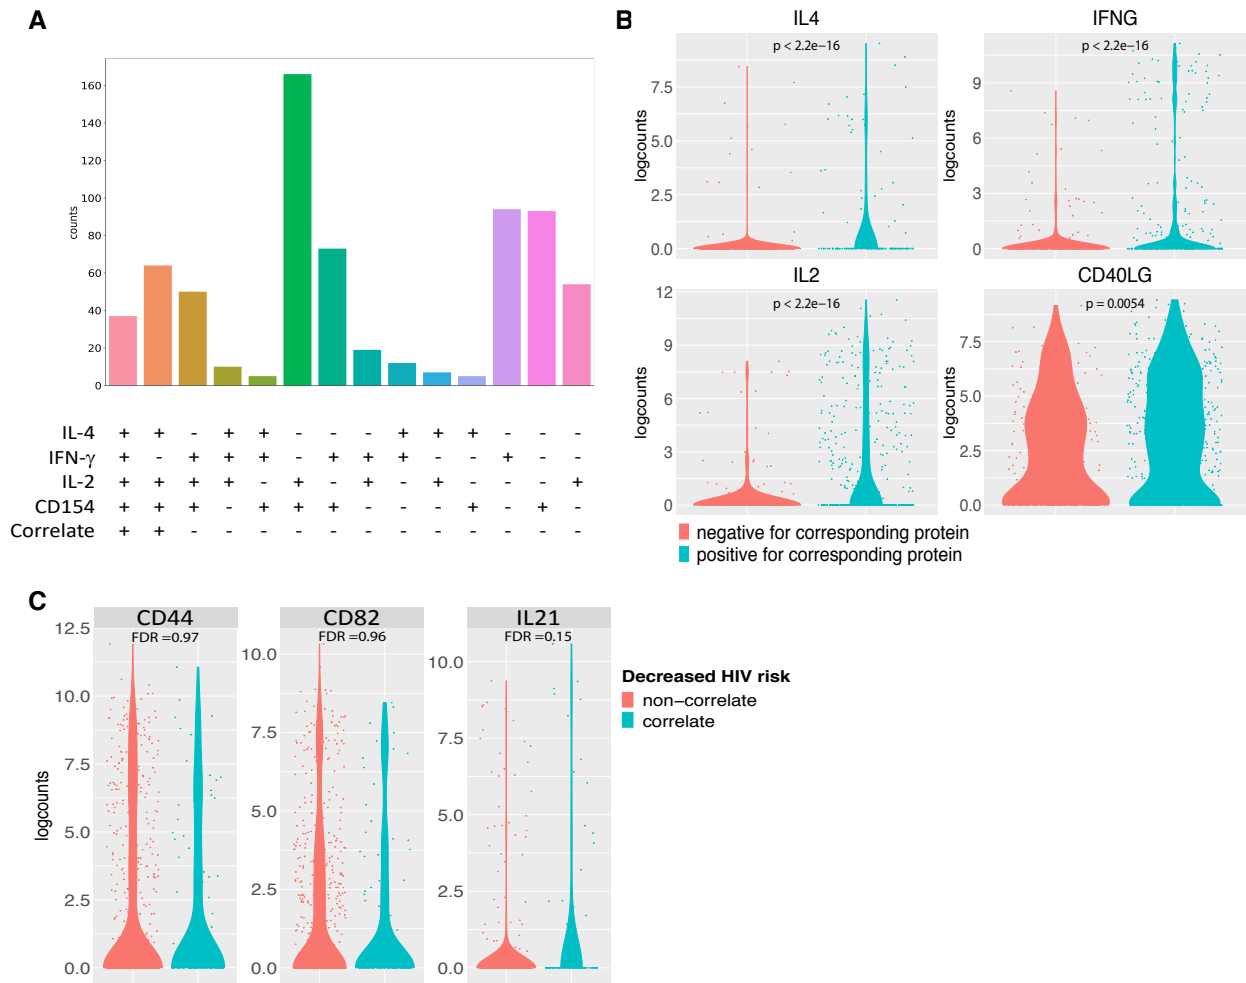

**Figure S1.** A) The number (count) of individual env-specific CD4 T cells in the scRNA Seq dataset (out of a total of 1,423 cells sequenced) as delineated by their respective cytokine protein expression determined by flow cytometry from the multiplexed cytokine capture assay. B) Cytokine-expressing CD4 T cells (by capture assay) had significantly higher levels of the corresponding cytokine mRNA transcripts compared to cytokine protein-negative CD4 T cells. Violin plots show the *IL4*, *IFNG*, *IL2*, and D) *CD40LG* transcript levels (in logcounts) for each cell that was either positive (blue) or negative (red) for the corresponding cytokine’s protein expression. Wilcoxon rank was used to determine significance. C) Transcript levels of *CD44*, *CD82* and *IL21* among vaccine-specific CD4 T cells with “correlate” or “non-correlate” cytokine profile.

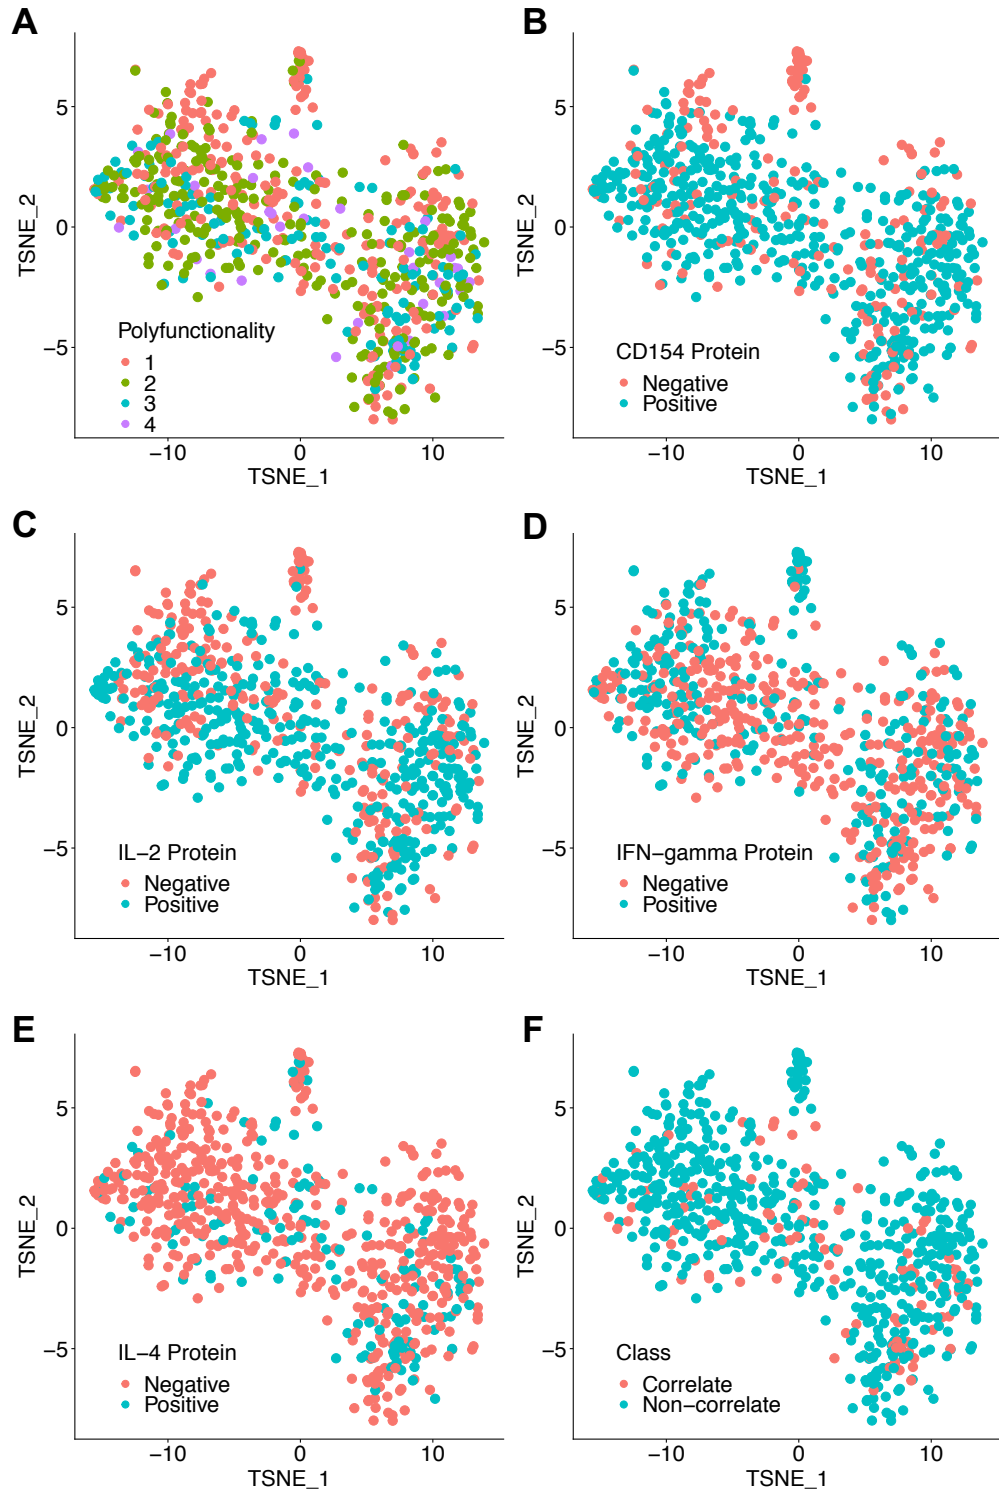

**Figure S2.** T-Distributed Stochastic Neighbor Embedding (t-SNE) clustering of env-specific CD4 T cells by single cell gene expression. Cells are colored by protein expression (detected by the multiplexed cytokine capture assay): A) by degree of polyfunctionality (i.e., number of contemporaneous functions/cytokines), individual functions: B) CD154, C) IL-2, D) IFN-g, E) IL-4 and F) by the polyfunctional cytokine profiles associated with reduced risk of HIV infection in the RV144 vaccine trial, i.e., “correlate” versus “non-correlate”.

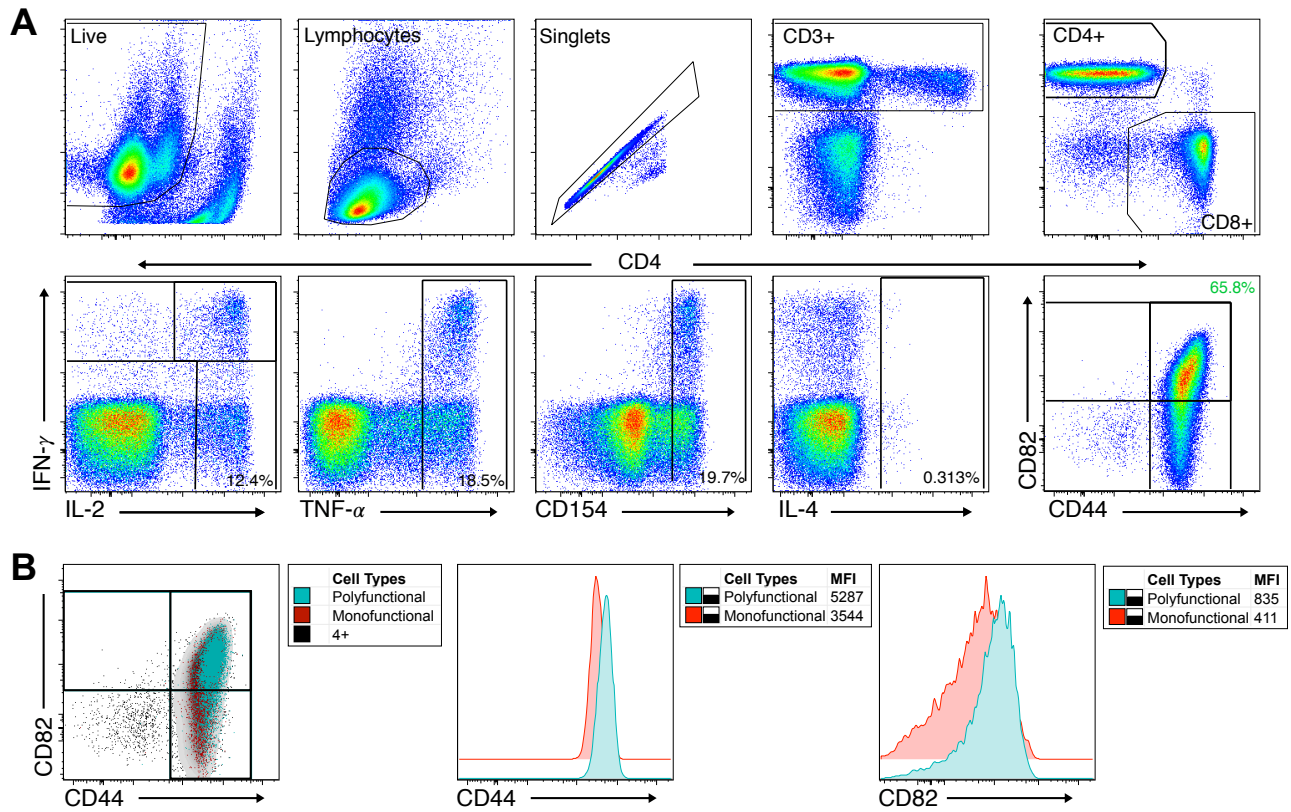

**Figure S3. Surface expression of CD44 and CD82 were upregulated on polyfunctional CD4 T cells.** PBMCs from a health donor were stimulated with SEB. Cytokine expression was detected by ICS assay with costaining for CD44 and CD82 surface expression. A) Top Row: the gating hierarchy shows the sequential selection of live, lymphocyte, singlet CD3+ CD4+ T cells. Bottom Row: CD4 T cell expression of cytokines and activation markers. Monofunctional CD4 T cells were defined as T cells expressing any individual cytokine (IFN- $\gamma$ , IL-2, TNF, CD154 or IL-4). Polyfunctional CD4 T cells were defined as T cells co-expressing 2 or more cytokines. B) CD82 and CD44 protein expression on polyfunctional and monofunctional CD4 T cells.

**Table S1. Flow cytometry and cytokine capture reagents**

| <b>Assay</b>            | <b>Antibody target and fluorochrome</b> | <b>Manufacturer</b>    | <b>Clone</b> | <b>Catalog Number</b> | <b>Titer (μL)</b> |
|-------------------------|-----------------------------------------|------------------------|--------------|-----------------------|-------------------|
| Multiplex Capture Assay | Fixable Live/Dead Aqua                  | Invitrogen             | N/A          | L34957                | 0.2               |
|                         | CD154 (CD40L) PE-Cy7                    | BioLegend              | 24-31        | 310832                | 0.15              |
|                         | CD4 BV421                               | BD Bioscience          | SK3          | 566907                | 0.5               |
|                         | CD8 Q705                                | Invitrogen             | 3B5          | Q10059                | 0.5               |
|                         | CD14 BV510                              | BioLegend              | M5E2         | 301842                | 1.0               |
|                         | CD19 BV510                              | BD Bioscience          | SJ25C1       | 562947                | 1.0               |
|                         | CD56 APC-Cy7                            | BioLegend              | HCD56        | 318332                | 0.25              |
|                         | CD45RA BV605                            | BioLegend              | HI100        | 304133                | 0.25              |
|                         | CCR7 BV786                              | BioLegend              | G043H7       | 353226                | 2.0               |
|                         | IL-2 APC                                | Miltenyi Biotec        | N/A          | 130-090-763           | 1.0               |
|                         | IFN-γ FITC                              | Miltenyi Biotec        | N/A          | 130-090-433           | 1.0               |
|                         | IL-4 PE                                 | Miltenyi Biotec        | N/A          | 130-054-102           | 5.0               |
|                         | ICS Assay                               | Fixable Live/Dead Blue | Invitrogen   | N/A                   | L34962            |
| CD3 APC-Fire750         |                                         | BioLegend              | UCHT1        | 300470                | 0.1               |
| CD4 BV480               |                                         | BD Bioscience          | SK3          | 566104                | 0.1               |
| CD8 BUV805              |                                         | BD Bioscience          | SK1          | 612889                | 0.05              |
| CD44 FITC               |                                         | BioLegend              | BJ18         | 338804                | 0.1               |
| CD82 PE-Cy7             |                                         | BioLegend              | ASL-24       | 342110                | 0.02              |
| IFN-γ V450              |                                         | BD Bioscience          | B27          | 560371                | 1.0               |
| IL-2 APC                |                                         | BioLegend              | MQ1-17H12    | 500310                | 0.25              |
| IL-4 BB700              |                                         | BD Bioscience          | MP4-25D2     | Custom                | 0.05              |
| TNF BUV395              |                                         | BD Bioscience          | MAb11        | 563996                | 0.1               |
| CD154 (CD40L) BUV737    |                                         | BD Bioscience          | TRAP1        | 748983                | 0.4               |
